# Supplementary material
Source: PubMed Central journal article supplement (PMC5568788)
Supplement: NIHMS892757-supplement-supplement_1.pdf [file NIHMS892757-supplement-supplement_1.pdf]

Supplementary Table 1. Absolute standardized difference between matched and non-matched cohort for checking balance among groups

| Variables                                                                                                                           | Chemotherapy vs No-chemotherapy |                        |
|-------------------------------------------------------------------------------------------------------------------------------------|---------------------------------|------------------------|
|                                                                                                                                     | Non-matched cohort (n=547)      | Matched cohort (n=178) |
| Age at diagnosis                                                                                                                    | 53.0%                           | 0.8%                   |
| LVI                                                                                                                                 | 11.7%                           | 12.4%                  |
| Tumor size                                                                                                                          | 9.8%                            | 6.8%                   |
| Grade                                                                                                                               | 9.1%                            | 4.1%                   |
| Histology                                                                                                                           | 2.7%                            | 10.8%                  |
| Surgery                                                                                                                             | 1.4%                            | 4.6%                   |
| Endocrine therapy                                                                                                                   | 15.2%                           | 7.7%                   |
| Age at diagnosis/ surgery interaction                                                                                               | 5.5%                            | 5.3%                   |
| Grade/ surgery interaction                                                                                                          | 10.4%                           | 6.2%                   |
| Tumor size/ surgery interaction                                                                                                     | 0.4%                            | 2.8%                   |
| Note. Absolute standardized difference <10% for the matching cohort suggests a substantial reduction of bias between the two groups |                                 |                        |

Supplementary Table 2. Multivariable analysis of patients who underwent chemotherapy versus those who did not, by standard recurrence original (RS) category

| <b>Recurrence score</b>               | <b>HR [95% CI]</b> | <b>P value</b> |
|---------------------------------------|--------------------|----------------|
| <b>&lt;18</b>                         |                    |                |
| Chemotherapy received vs not received |                    |                |
| IDFS                                  | 1.09 [0.14, 8.62]  | 0.938          |
| RFS                                   | *                  | *              |
| DRFS                                  | *                  | *              |
| OS                                    | *                  | *              |
| <b>18-30</b>                          |                    |                |
| Chemotherapy received vs not received |                    |                |
| IDFS                                  | 0.78 [0.34, 1.80]  | 0.571          |
| RFS                                   | 0.98 [0.32, 3.06]  | 0.975          |
| DRFS                                  | 0.80 [0.23, 2.71]  | 0.716          |
| OS                                    | 0.86 [0.15, 4.91]  | 0.861          |
| <b>&gt;30</b>                         |                    |                |
| Chemotherapy received vs not received |                    |                |
| IDFS                                  | 0.50 [0.13, 2.02]  | 0.334          |
| RFS                                   | 0.38 [0.09, 1.66]  | 0.200          |
| DRFS                                  | 0.32 [0.07, 1.47]  | 0.143          |
| OS                                    | 0.13 [0.01, 1.30]  | 0.082          |

\*Not reported due to a small number of events with unstable results.

Abbreviations: IDFS, invasive disease-free survival; RFS, recurrence-free survival; DRFS, distant relapse-free survival; OS, overall survival; RS, recurrence score; HR, hazard ratio; CI, confidence interval.
